# Supplementary material for: RNAi–Based Functional Profiling of Loci from Blood Lipid Genome-Wide Association Studies Identifies Genes with Cholesterol-Regulatory Function
Source: PubMed Central journal article supplement (PMC3585126; doi:10.1371/journal.pgen.1003338), 2013-02-28

# Figure S3

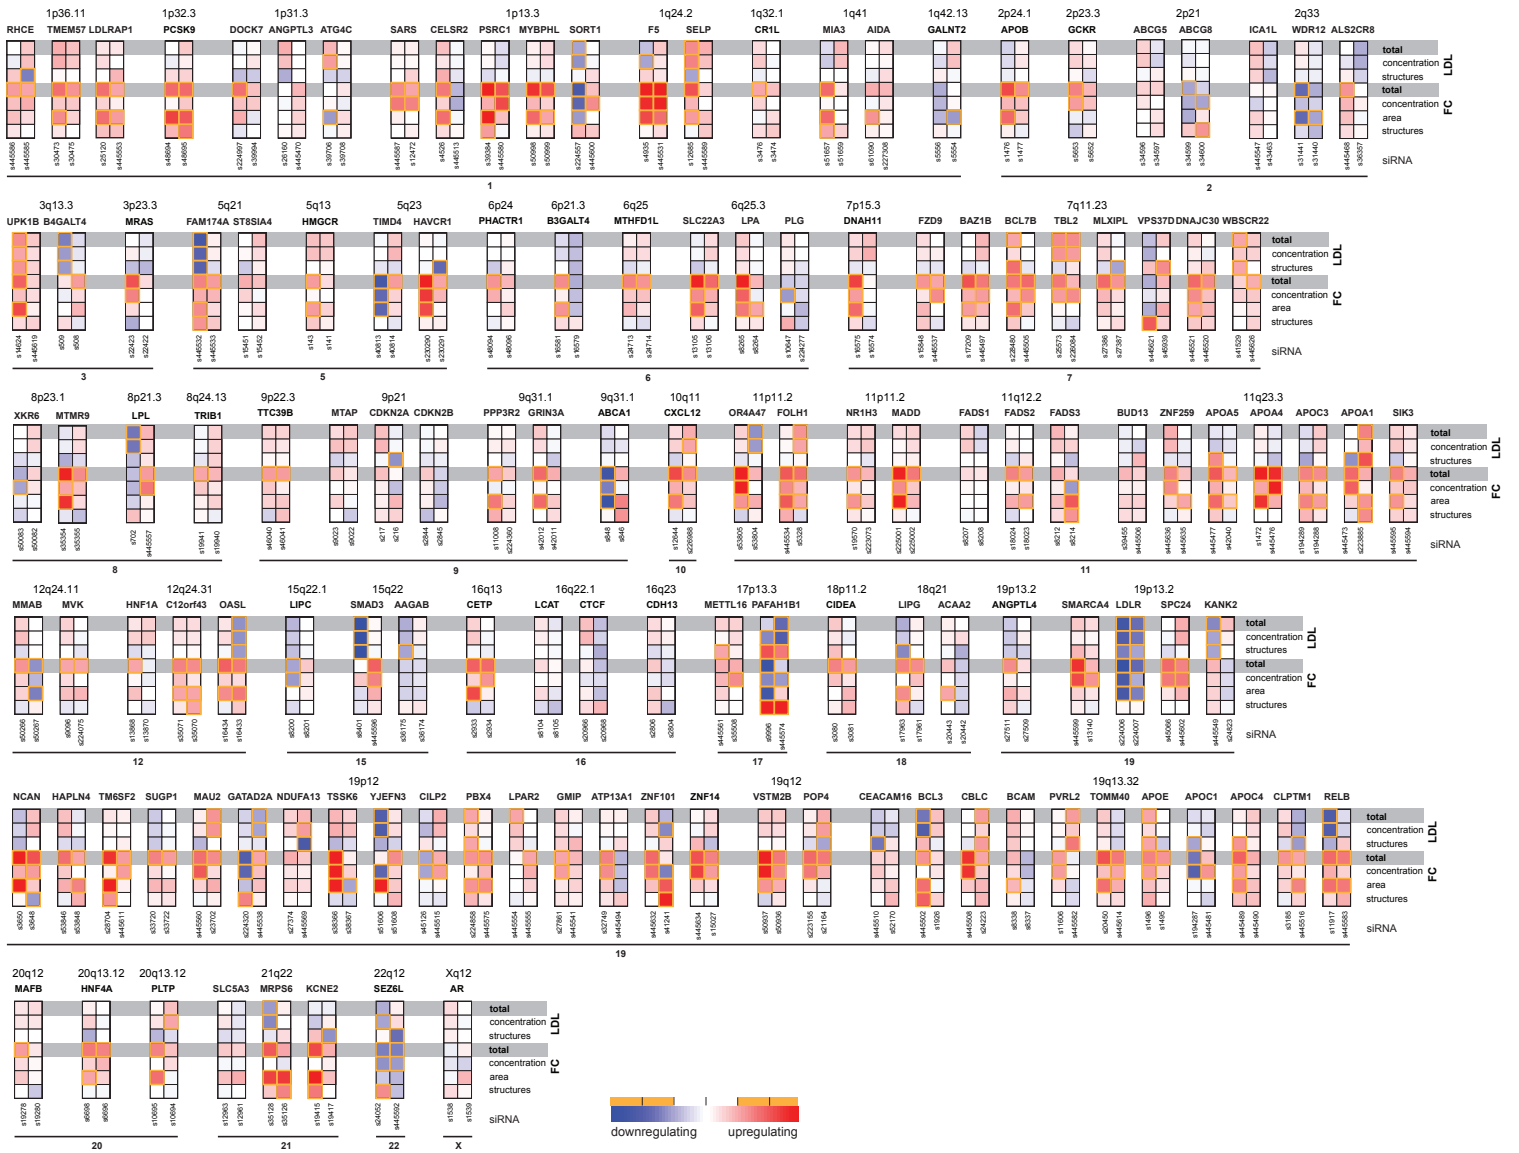

Supplement: pgen.1003338.s003.pdf [file pgen.1003338.s003.pdf]
