# Supplementary material for: RNAi–Based Functional Profiling of Loci from Blood Lipid Genome-Wide Association Studies Identifies Genes with Cholesterol-Regulatory Function
Source: PLOS journal article supplement (doi:10.1371/journal.pgen.1003338), 2013-02-28

**Figure S4**

**A**

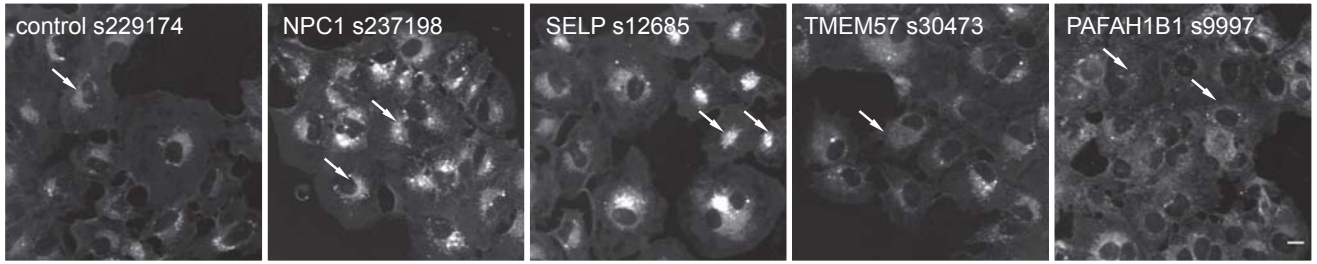

**B**

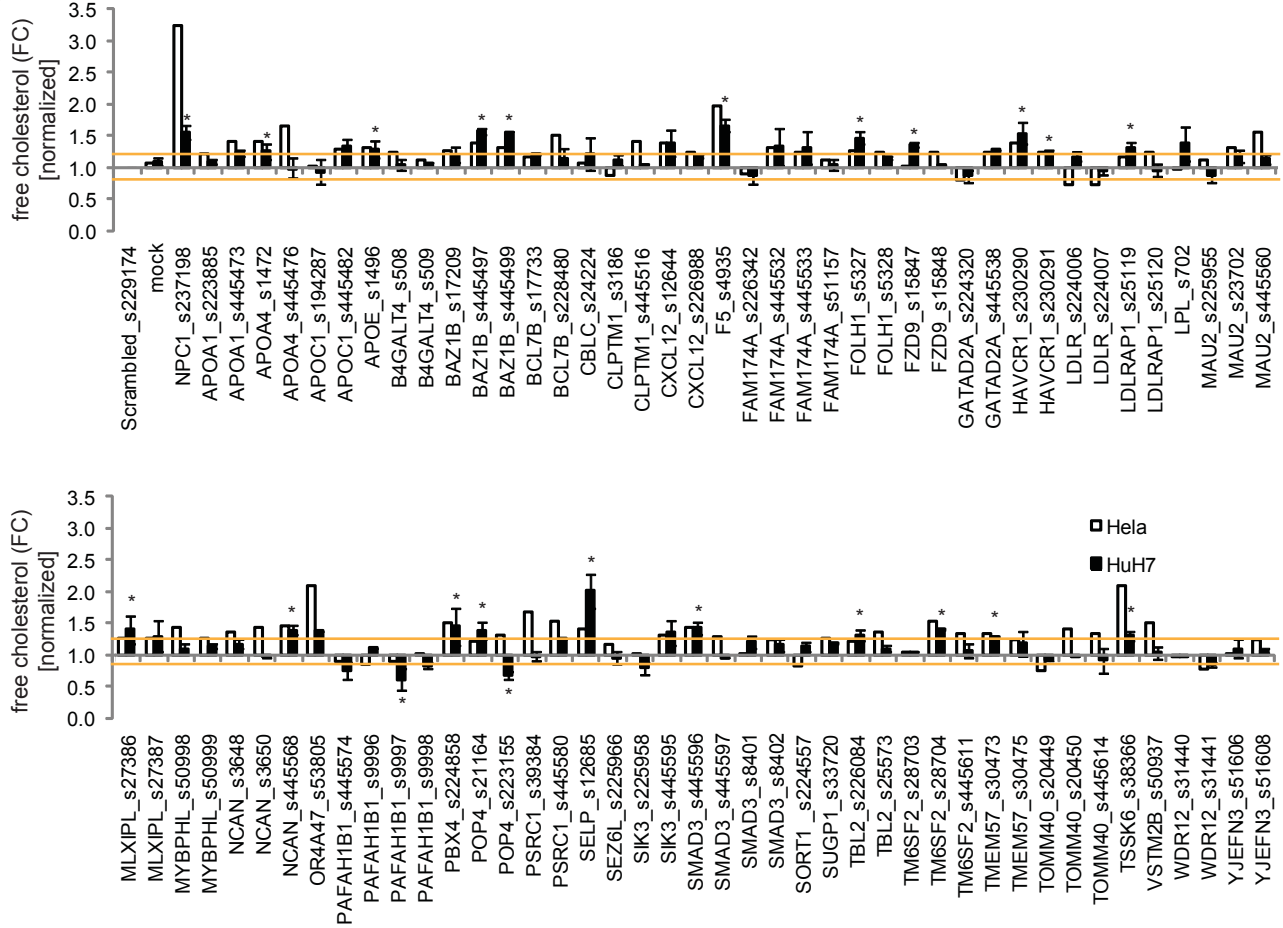

**C**

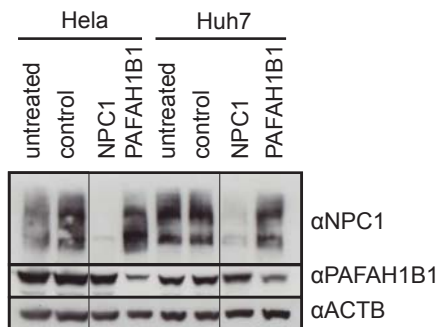

**D**

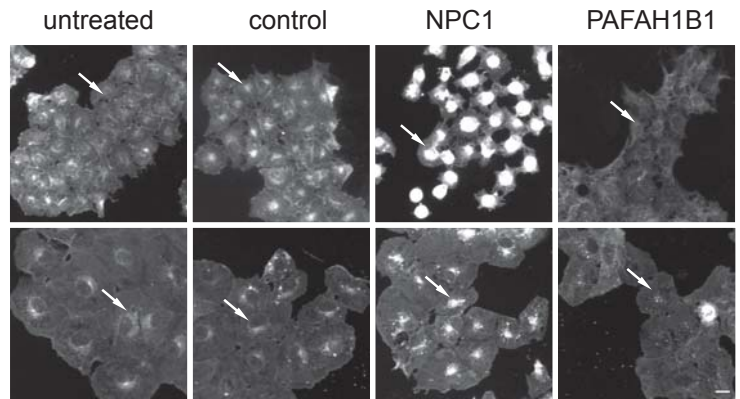

Supplement: S4 (10.1371/journal.pgen.1003338.s004) [file journal.pgen.1003338.s004]
