# Supplementary material for: RNAi–Based Functional Profiling of Loci from Blood Lipid Genome-Wide Association Studies Identifies Genes with Cholesterol-Regulatory Function
Source: PLOS journal article supplement (doi:10.1371/journal.pgen.1003338), 2013-02-28

# Figure S5

## Plate 1

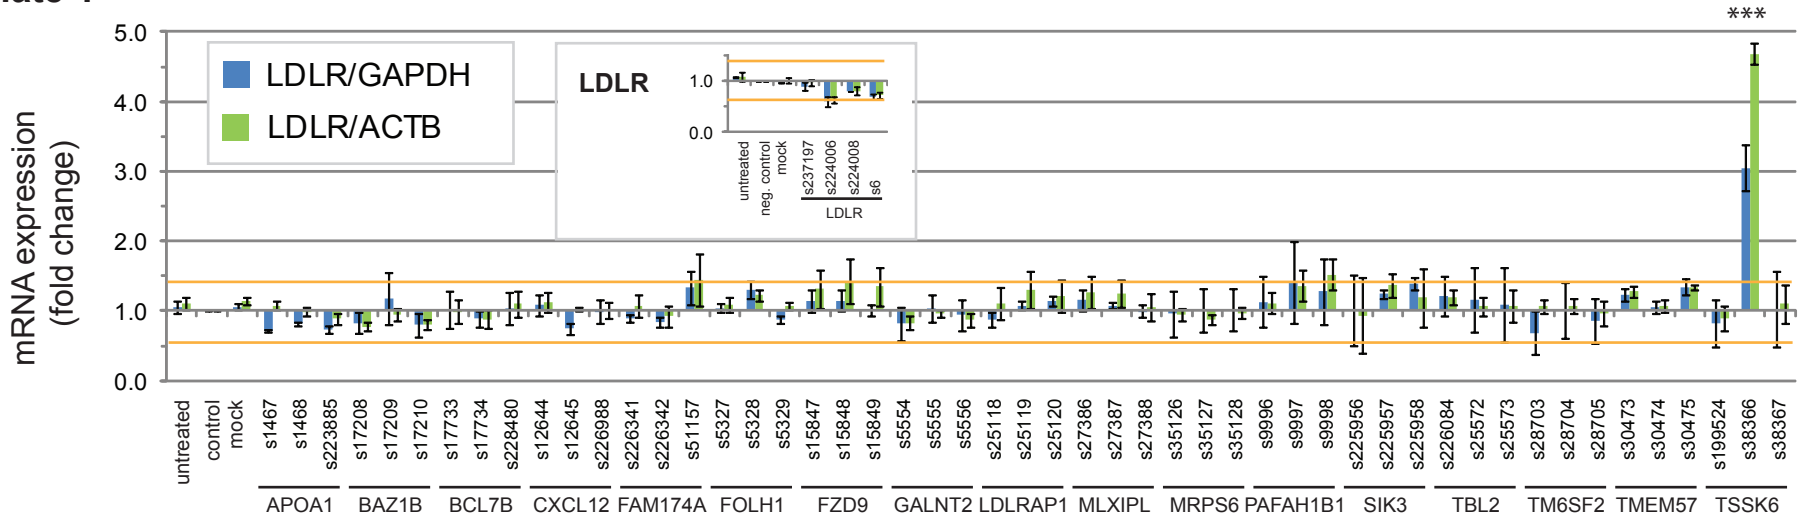

## Plate 2

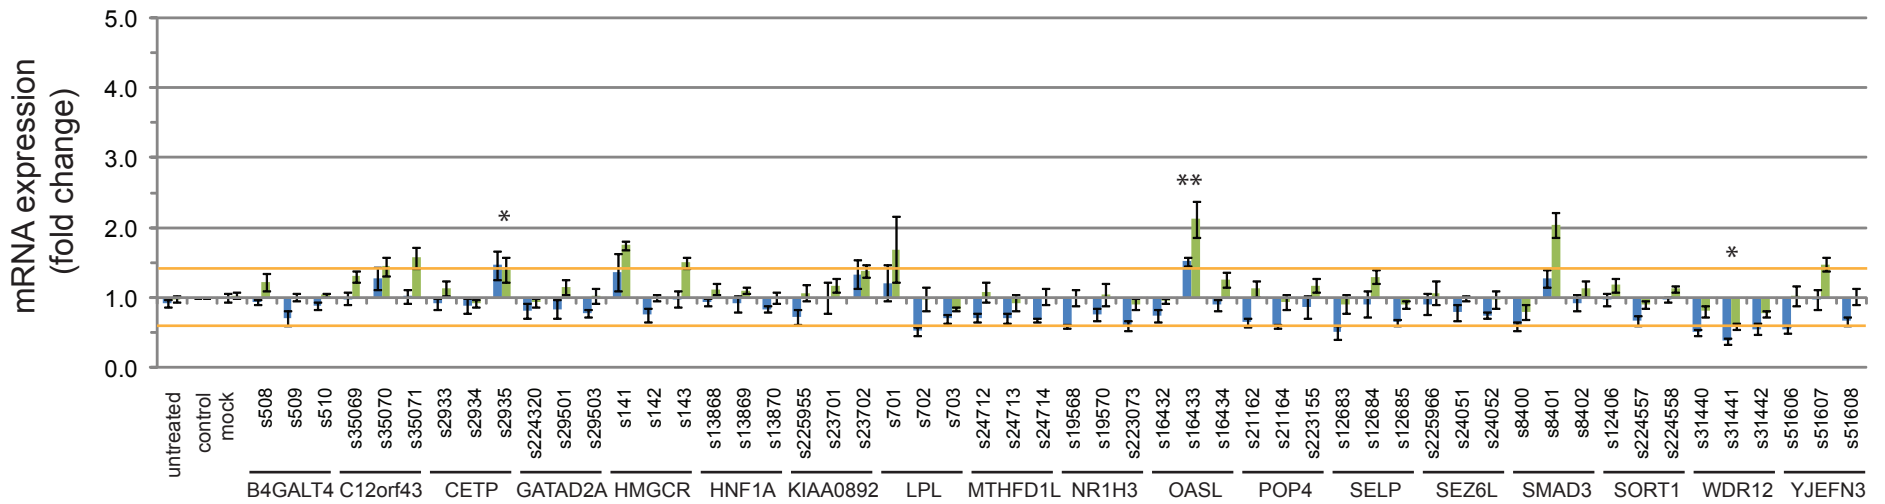

Supplement: S5 (10.1371/journal.pgen.1003338.s005) [file journal.pgen.1003338.s005]
