# Supplementary material for: RNAi–Based Functional Profiling of Loci from Blood Lipid Genome-Wide Association Studies Identifies Genes with Cholesterol-Regulatory Function
Source: PLoS Genet. 2013 Feb 28;9(2):e1003338. doi: 10.1371/journal.pgen.1003338 (PMC3585126; doi:10.1371/journal.pgen.1003338)
Supplement: Table S1 — Overview of genes analyzed and the GWAS that show association to blood lipid levels and/or CAD/MI. (XLS) [file pgen.1003338.s008.xls]

## Sheet: Table S1
Table S1: Overview of genes analyzed and the GWAS that show association to blood lipid levels and/or CAD/MI*
locus§	genes	studies with association	all genes ± 50kbp of all SNPs	Saxena et al. 2007	Aulchenko et al. 2008	Burkhardt et al. 2008	Kathiresan et al. 2008	Sandhu et al. 2008	Wallace et al. 2008	Willer et al. 2008	Kathiresan et al. 2009a	Sabatti et al. 2009	Chasman et al. 2009	Waterworth et al. 2010	Teslovich et al. 2010	Saxena et al. 2007	Aulchenko et al. 2008	Kathiresan et al. 2008	Wallace et al. 2008	Willer et al. 2008	Kathiresan et al. 2009a	Kooner et al. 2009	Ridker et al. 2009	Sabatti et al. 2009	Chasman et al. 2009	Waterworth et al. 2010	Teslovich et al. 2010	Saxena et al. 2007	Aulchenko et al. 2008	Kathiresan et al. 2008	Pollin et al. 2008	Wallace et al. 2008	Willer et al. 2008	Kathiresan et al- 2009	Kooneret al. 2009	Sabatti et al. 2009	Chasman et al. 2009	Waterworth et al. 2010	Teslovich et al. 2010	Aulchenko et al. 2008	Teslovich et al. 2010	McPherson et al.2007	WTTC 2007	Samani et al. 2007	Willer et al. 2008	Erdmann et al. 2009	Trégouët et al. 2009	Waterworth et al. 2010	Schunkert et al. 2011
				LDL												HDL												TG												TC		CAD
1p36.11	RHCE / TMEM57 / LDLRAP1	2	x												x																									x	x
1p32.3	PCSK9	7					x			x	x		x	x	x																										x				x
1p31.3	DOCK7 / ANGPTL3 / ATG4C	7													x														x	x		x	x	x				x	x	x	x
1p13.3	SARS / CELSR2 / PSRC1 / MYBPHL / SORT1	13	x		x		x	x	x	x	x	x	x	x	x																									x	x			x	x			x	x
1q24.2	SELP / F5	1	x																													x
1q32.1	CR1L	1	x									x
1q41	MIA3 / AIDA	3	x																																									x					x
1q42.13	GALNT2	5	x															x		x	x					x	x			x			x						x
2p24.1	APOB	11	x	x	x		x	x	x	x	x	x	x	x	x		x									x	x		x	x				x		x	x	x	x	x	x				x			x
2p23.3	GCKR	10																										x	x	x		x	x	x		x	x	x	x		x
2p21	ABCG5 / ABCG8	4			x						x		x		x																									x	x
2q33	ICA1L / WDR12 / ALS2CR8	2	x																																														x
3q13.3	B4GALT4 / UPK1B	1	x							x																																			x
3q22.3	MRAS	2																																												x			x
5q13	HMGCR	7			x	x	x				x		x	x	x																									x	x
5q21	FAM174A / ST8SIA4	1	x																																								x
5q23	TIMD4 / HAVCR1	2	x								x				x																								x		x
6p24	PHACTR1	2	x																																														x
6p21.3	B3GALT4	1								x																																			x
6q25	MTHFD1L	2	x																																								x	x
6q25.3	SLC22A3 / LPA / PLG	3													x												x														x						x		x
7p15.3	DNAH11	2	x		x										x																										x
7q11.23	FZD9 / BAZ1B / BCL7B / TBL2 / MLXIPL / VPS37D / DNAJC30 / WBSCR22	9	x																								x		x	x		x	x	x	x		x	x	x
8p23.1	XKR6 / MTMR9	1	x																															x
8p21.3	LPL	12	x														x	x	x	x	x	x	x		x	x	x	x	x	x		x	x	x	x	x	x	x	x									x
8q24.13	TRIB1	7	x											x	x												x			x			x	x			x	x	x	x	x							x
9p22.3	TTC39B	3	x																		x					x	x														x
9p21	CDKN2A / CDKN2B / MTAP	6	x																																							x	x	x					x
9q31.1	GRIN3A / PPP3R2	1																		x
9q31.1	ABCA1	10	x														x	x	x	x	x	x	x		x	x	x														x
10q11	CXCL12	3	x																																									x					x
11p11.2	NR1H / MADD	1																						x
11p11.2	FOLH1 / OR4A47	1	x														x
11q12.2	FADS1 / FADS2 / FADS3	5			x							x			x		x				x					x	x							x				x	x	x	x
11q23.3	APOA1 / APOA4 / APOA5 / APOC3 / SIK3 / BUD13 / ZNF259	12	x											x	x			x			x		x		x	x	x		x	x	x	x	x	x	x		x	x	x		x							x	x
12q24.11	MMAB / MVK	4																		x	x					x	x
12q24.31	HNF1A / C12orf43 / OASL	4	x								x		x		x																										x					x
15q22.1	LIPC	11	x														x	x	x	x	x	x	x	x	x	x	x						x						x		x
15q22	SMAD3 / AAGAB	1	x																																									x
16q13	CETP	12													x	x	x	x	x	x	x	x	x	x	x	x	x										x	x	x		x
16q22.1	LCAT / CTCF	6															x			x	x			x		x	x
16q23	CDH13	1	x																																								x
17p13.3	PAFAH1B1 / METTL16	1	x																					x
18p11.2	CIDEA	1																														x
18q21	LIPG / ACAA2	8	x														x	x		x	x		x		x	x	x														x
19p13.2	ANGPTL4	2																			x						x
19p13.2	LDLR / SMARCA4 / SPC24 / KANK2	12	x		x		x	x	x	x	x	x	x	x	x																									x	x				x				x
19p12	ZNF101/ ZNF14 / NCAN / PBX4 / GATAD2A / HAPLN4 / MAU2 / NDUFA13 / SUGP1 / TM6SF2 / TSSK6 / YJEFN3 / CILP2 / LPAR2 / GMIP / ATP13A1	6	x				x			x	x			x	x															x			x	x				x	x	x	x				x
19q12	VSTM2B/POP4	1	x																																								x
19q13.32	APOE / APOC1 / APOC4 / TOMM40 / BCAM / BCL3 / CLPTM1 / CEACAM16 / CBLC / PVRL2 / RELB	13	x	x	x	x	x	x	x	x	x	x	x	x	x				x				x		x	x	x		x								x	x	x	x	x				x			x
20q12	MAFB	2	x								x				x																										x
20q13.12	HNF4A	2																			x						x														x
20q13.12	PLTP	4																			x		x		x		x							x			x		x
21q22	SLC5A3 / MRPS6 / KCNE2	2	x																																														x
22q12	SEZ6L	1	x																																								x
X	AR	1	x									x
	loci analyzed in screen			2	8	2	7	4	4	8	11	7	8	9	19	1	9	7	5	9	14	4	8	5	8	13	19	2	7	9	1	7	9	11	3	3	9	11	15	11	25	1	6	6	8	2	1	6	11
	loci in reported in study			2	8	2	7	4	4	8	11	7	9	12	37	1	9	7	5	9	14	4	9	5	9	14	47	2	7	9	1	11	9	11	3	3	9	13	32	11	52	1	7	7	8	2	1	6	23
*LDL: blood LDL-C levels, HDL: blood HDL-C levels, TG: blood TG levels, TC: blood Total Cholesterol levels, CAD: Coronary Artery disease, MI: Myocardial Infarction
§ Of the 64 loci reported until 2009 eight loci were omitted from analysis either due to the absence of annotated genes in the vicinity of the lead SNPs (2q36.3 (Samani et al., 2007), 4q12 (Wallace et al., 2008), 9p24.3 (Wallace et al., 2008), 15q14 (Sabatti et al., 2009)) or because of annotation discrepancies of published genomic positions relative to the current human reference genome GRCh37 (…
[truncated: 7 more columns]
